# Supplementary material for: A facile route to fabrication of inorganic–small organic molecule cable-like nanocomposite arrays
Source: Royal Society of Chemistry journal article supplement (doi:10.1039/b506459g), 2005-01-01
Supplement: b506459g.pdf [file b506459g.pdf]

## **A facile route to fabrication of inorganic-small organic molecule cable-like nanocomposite arrays**

Xiujuan Zhang,<sup>a,c</sup> Weigang Ju,<sup>a</sup> Xiaohong Zhang,<sup>\*a</sup> and Shuitong Lee<sup>\*b</sup>

### **Electronic Supplementary Information (ESI):**

#### **† Preparation of pyrene nanotubes:**

AAO membranes with an average pore diameter of 100 nm ( $100 \pm 10$  nm) were purchased from Whatman International Ltd. Pyrene was obtained from Aldrich and recrystallized twice before use.

Pyrene nanotubes were obtained by simple marination method.<sup>1</sup> In a typical procedure, the AAO template was marinated in a saturated pyrene/toluene solution and then the solution was allowed to evaporate. After the process was repeated several circles, the treated template was dried in a vacuum oven and this would reinforce the formed structure. The excess molecules on the surface of the template were removed by polishing with 1500 grid sand paper. Pyrene nanotubes with a diameter of about 100 nm were obtained inside the AAO templates.

<sup>1</sup> L. Y. Zhao, W. S. Yang, Y. Ma, J. N. Yao, Y. L. Li and H. B. Liu, *Chem. Commun.*, 2003, 2442.
